# Supplementary material for: Systematic comparison and prediction of the effects of missense mutations on protein-DNA and protein-RNA interactions
Source: PLOS journal article supplement (doi:10.1371/journal.pcbi.1008951), 2021-04-19
Supplement: S15 (10.1371/journal.pcbi.1008951.s015) [file journal.pcbi.1008951.s015]

# PEMPNI

Predictor for Effects of Mutations on Protein-Nucleic Acid Interactions

[Home](#)[About](#)[Dataset](#)[Help](#)[Contact](#)

## Prediction Task

Paste your complex file in PDB format [example](#)

or upload the PDB file from your local machine. Click [here](#) to download the example file.

Please input the correct parameters:

PDB ID:  eg. 1AAY

Chain ID:  eg. A

Mutation:  eg. D120A

Choose appropriate interaction type according to your data:

Input your Email [optional]:

## Result

Job 202102211416's result

### Summary of predicted results

| PDB ID | Chain ID | Position | Predicted affinity change | Predicted score | Significant decrease |
|--------|----------|----------|---------------------------|-----------------|----------------------|
| 1AAY   | A        | D120A    | 0.089                     | 0.122           | NO                   |

### Complex visualization

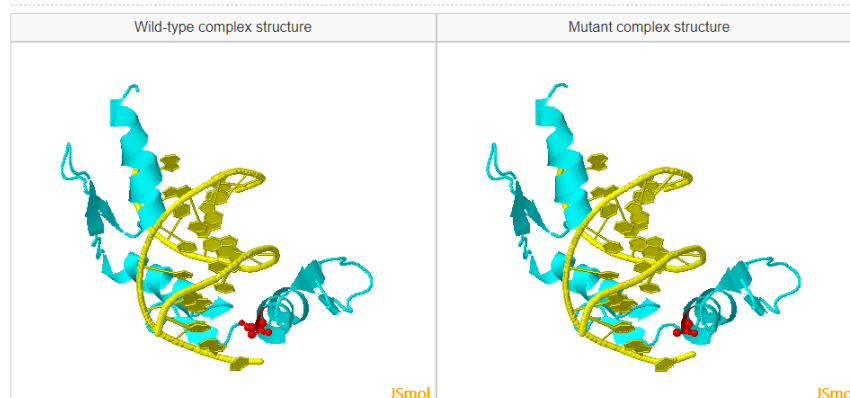

Red denotes the mutated site in your submitted complex.

Download the [wild-type](#) or [mutant](#) structural file.

**S15 Fig. Home page and result page of PEMPNI webserver.**
